# Supplementary material for: A pomegranate-structured sulfur cathode material with triple confinement of lithium polysulfides for high-performance lithium–sulfur batteries
Source: Royal Society of Chemistry journal article supplement (doi:10.1039/c7ta00035a), 2017-01-01
Supplement: c7ta00035a1.pdf [file c7ta00035a1.pdf]

---

## Electronic Supplementary Information (ESI)

### **Pomegranate-Structured Sulfur Cathode Material with Triple Confinement of Lithium Polysulfides for High-Performance Lithium- Sulfur Batteries**

Yingying Mi,<sup>ab†</sup> Wen Liu,<sup>a†</sup> Qian Wang,<sup>b</sup> Jianbin Jiang,<sup>a</sup> Gary W. Brudvig,<sup>a</sup> Henghui  
Zhou<sup>b</sup> and Hailiang Wang<sup>a\*</sup>

<sup>a</sup> Department of Chemistry and Energy Sciences Institute, Yale University, West Haven, CT 06516, USA

\*E-mail: [hailiang.wang@yale.edu](mailto:hailiang.wang@yale.edu)

<sup>b</sup> College of Chemistry and Molecular Engineering, Peking University, Beijing 100871, China

<sup>†</sup> These authors contributed equally.

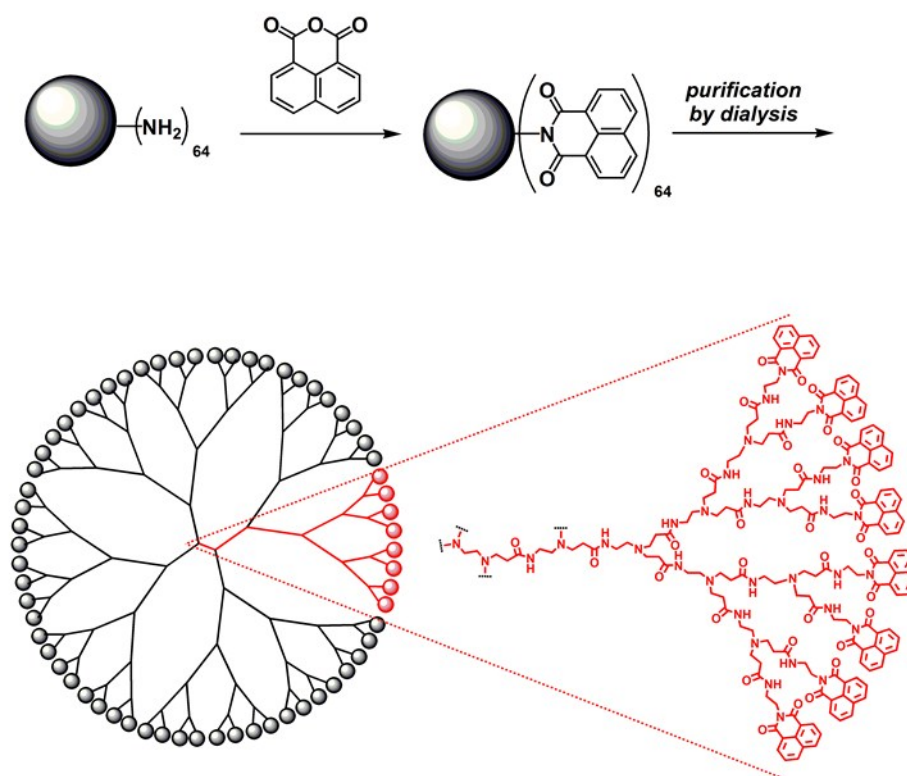

**Fig. S1** Schematic illustration of naphthalimide functionalization of PAMAM .

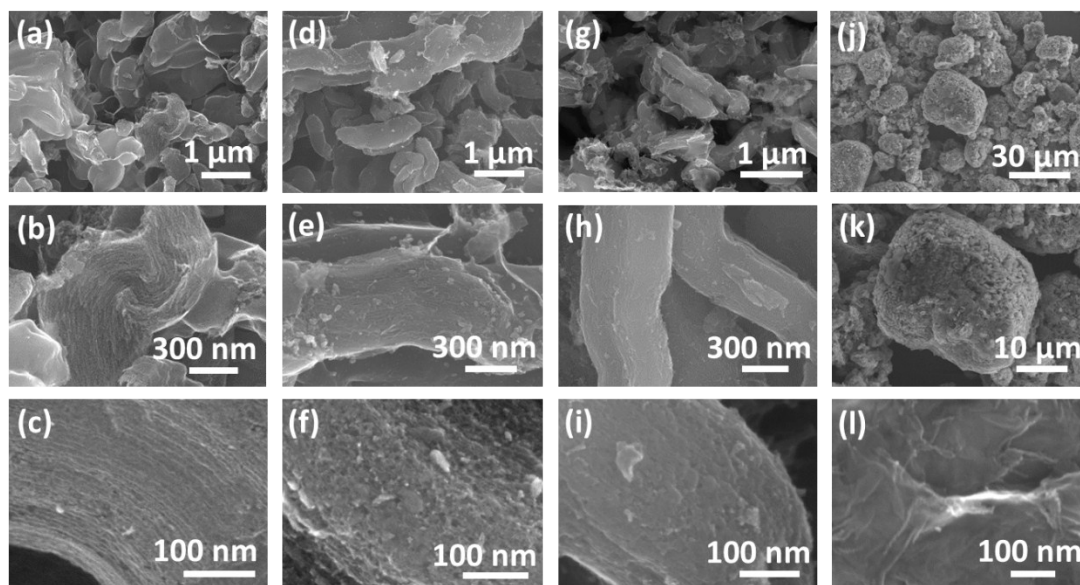

**Fig. S2** SEM images of (a, b, c) CMK-3, (d, e, f) Fc-CMK, (g, h, i) Fc-CMK@S, and (j, k, l) Fc-CMK@S@Den-GO.

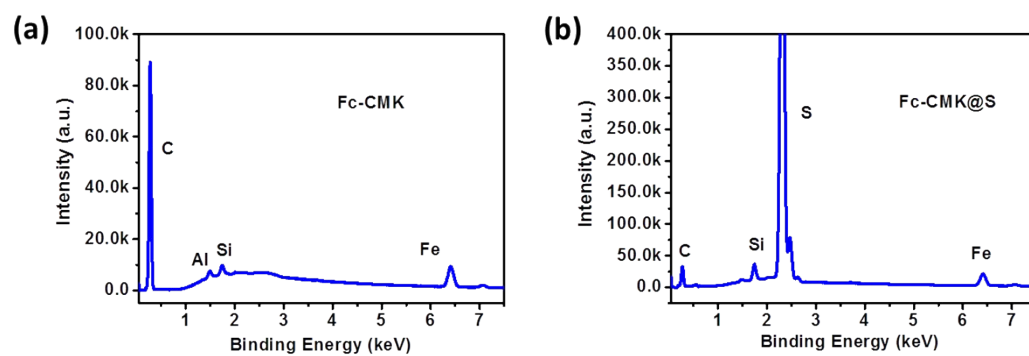

**Fig. S3** EDX spectra of (a) Fc-CMK and (b) Fc-CMK@S.

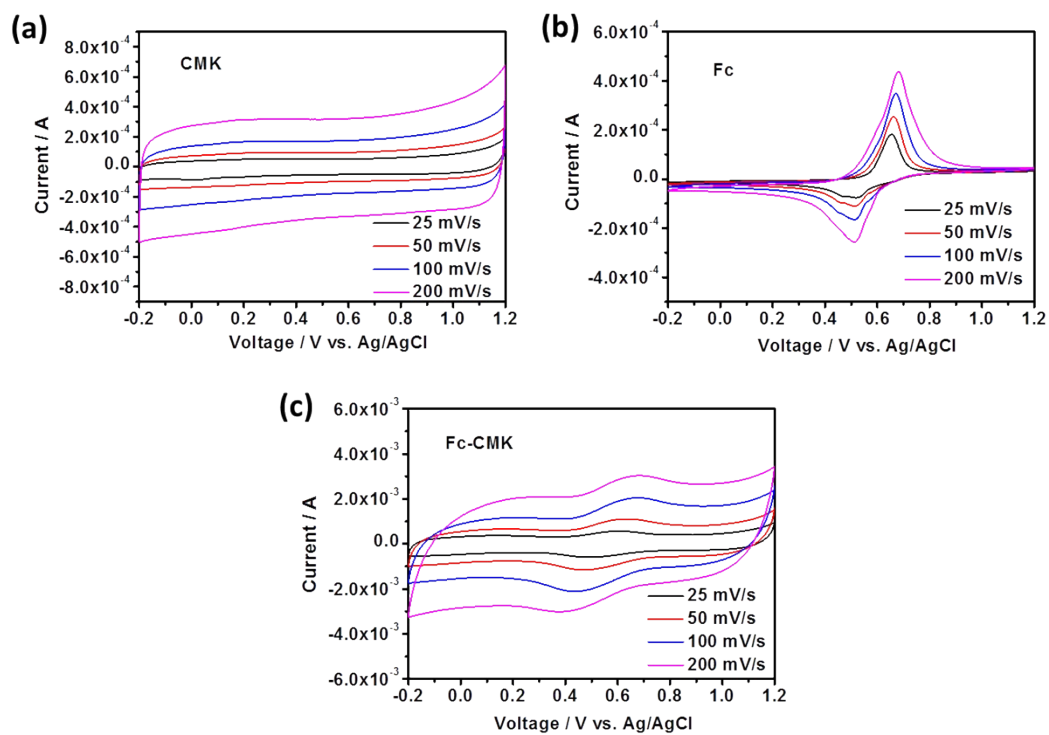

**Fig. S4** CV curves of (a) CMK-3, (b) Fc, and (c) Fc-CMK in 0.1 M PBS.

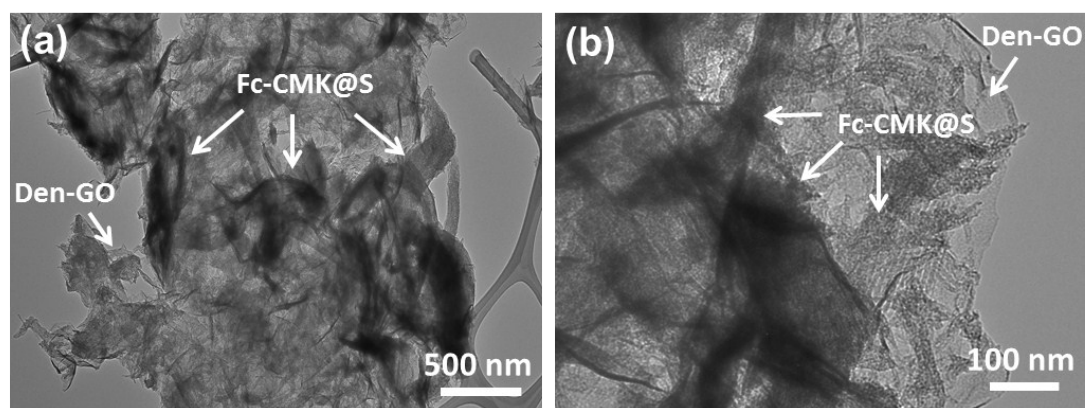

**Fig. S5** TEM images of Fc-CMK@S@Den-GO.

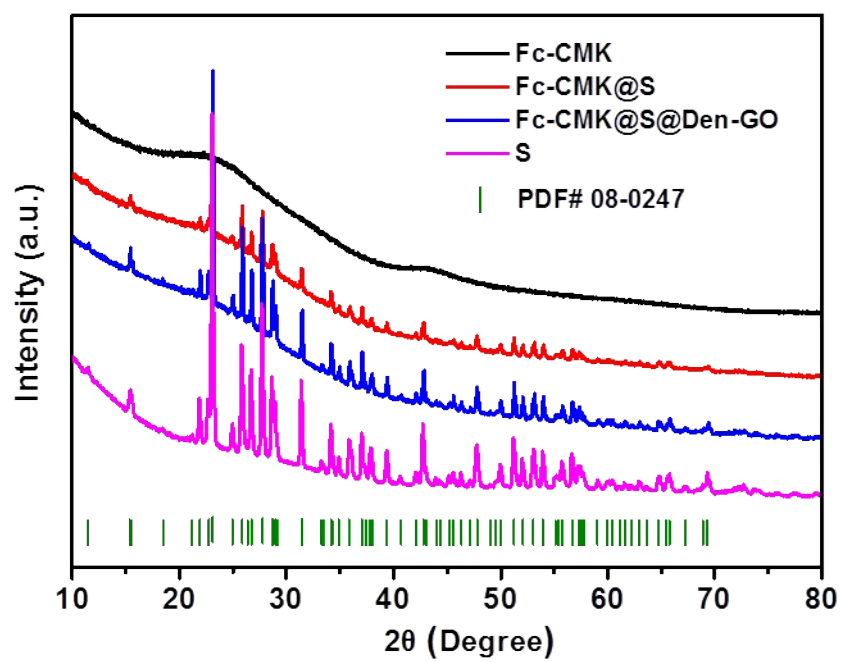

**Fig. S6** XRD patterns of Fc-CMK, Fc-CMK@S, Fc-CMK@S@Den-GO, and S (PDF#08-0247).

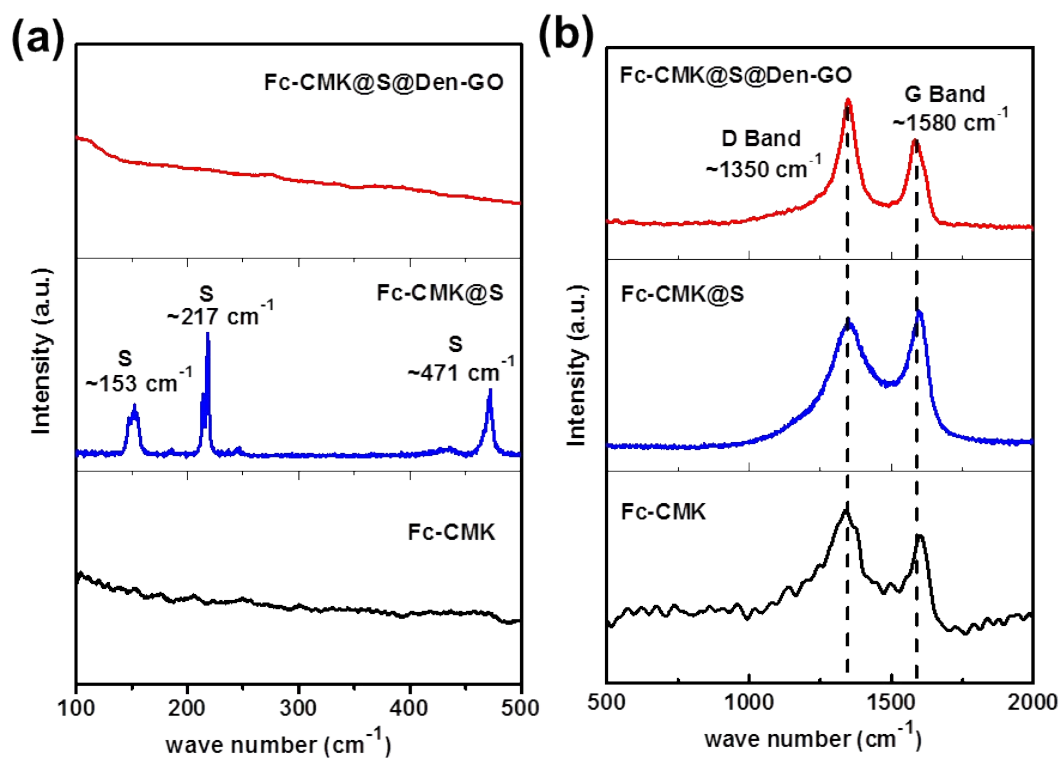

**Fig. S7** Raman spectroscopy of Fc-CMK, Fc-CMK@S, and Fc-CMK@S@Den-GO.

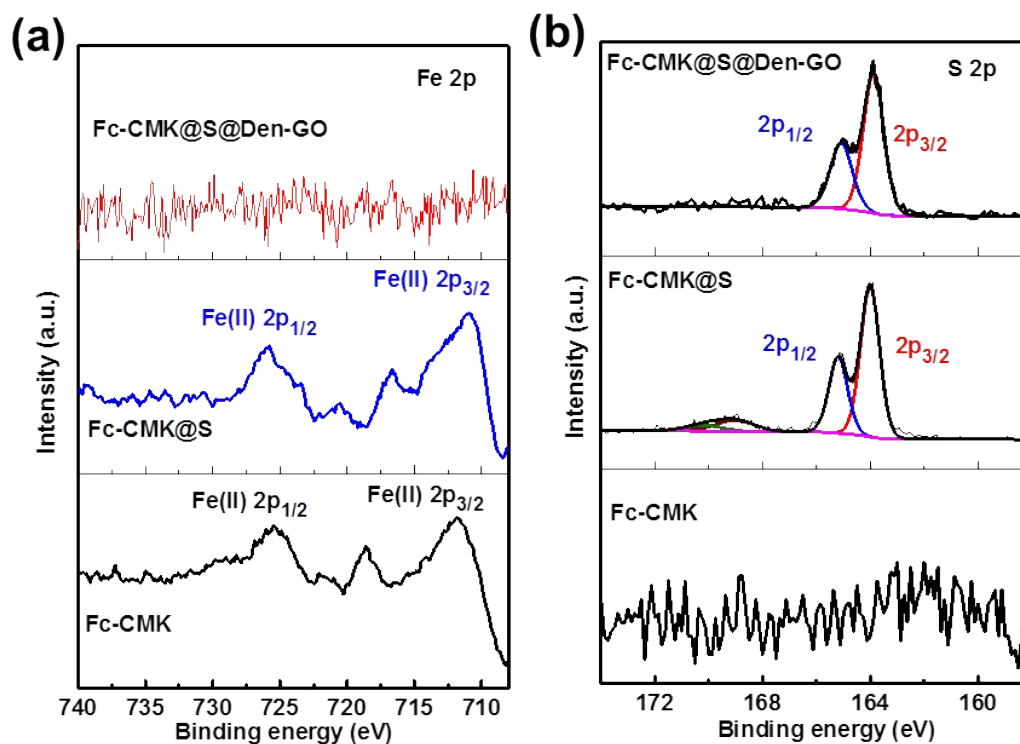

**Fig. S8** XPS analysis of Fc-CMK, Fc-CMK@S, and Fc-CMK@S@Den-GO.

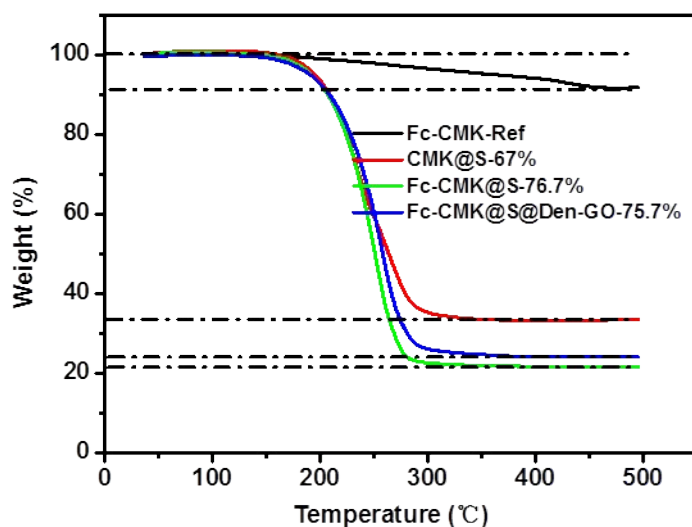

**Fig. S9** The TGA curves of Fc-CMK, CMK@S, Fc-CMK@S, and Fc-CMK@S@Den-GO. The weight loss for Fc-CMK (10%) is due to the evaporation of Fc. Therefore in Fc-CMK,  $m_{\text{CMK}} : m_{\text{Fc}} = 9 : 1$ . The weight losses for Fc-CMK@S (79%) and Fc-CMK@S@Den-GO (78%) are caused by removal of both S and Fc. Thus, the S content of Fc-CMK@S can be calculated as  $\frac{79\%X - 21\%X/9}{X} = 76.7\%$ , where X is the mass of Fc-CMK@S. Then the composition of Fc-CMK@S is 76.7 wt% S, 2.3 wt% Fc, and 21.0 wt% CMK-3. The composition of Fc-CMK@S@Den-GO was calculated to be 75.7 wt% S, 2.3 wt% Fc, 20.7 wt% CMK-3, and 1.3 wt% Den-GO in the same way.

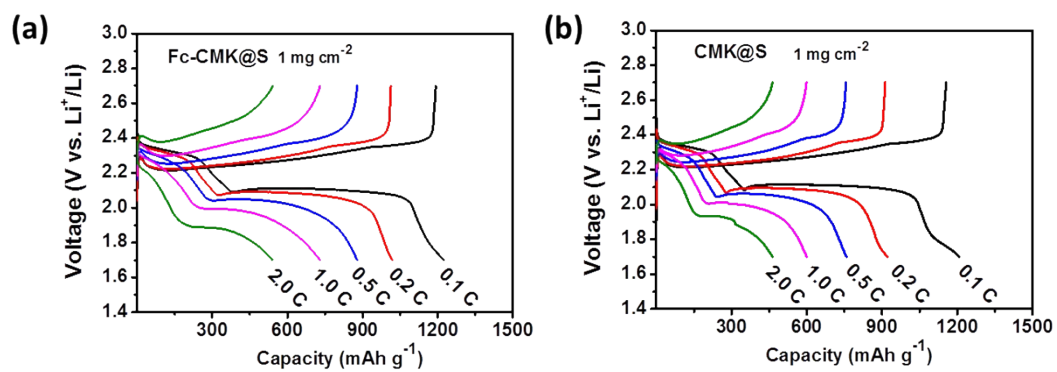

**Fig. S10** Discharging/charging voltage profiles of (a) Fc-CMK@S and (b) CMK@S. The S content of the materials are 76.7 wt% and 67.0 wt% for Fc-CMK@S and CMK@S, respectively. The S mass loading on the electrodes is  $\sim 1 \text{ mg cm}^{-2}$ .

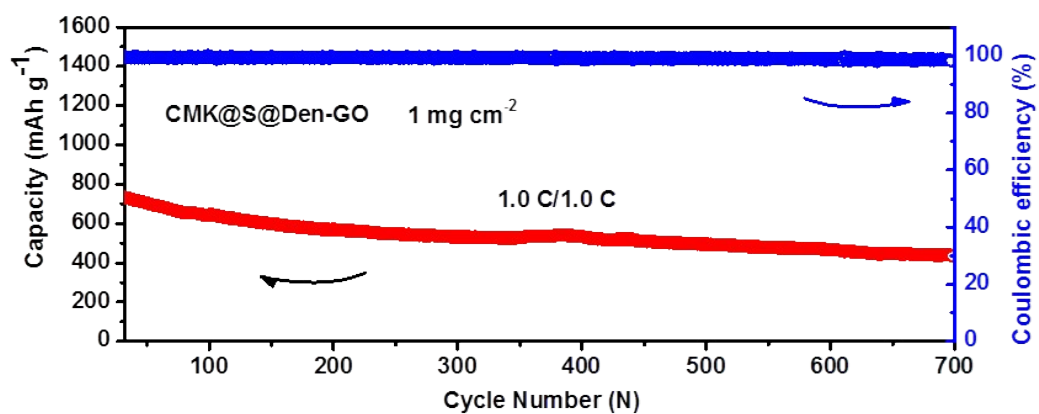

**Fig. S11** Long-term cycling stability of CMK@S@Den-GO at 1.0 C. The S mass loading on the electrodes is  $\sim 1 \text{ mg cm}^{-2}$ .

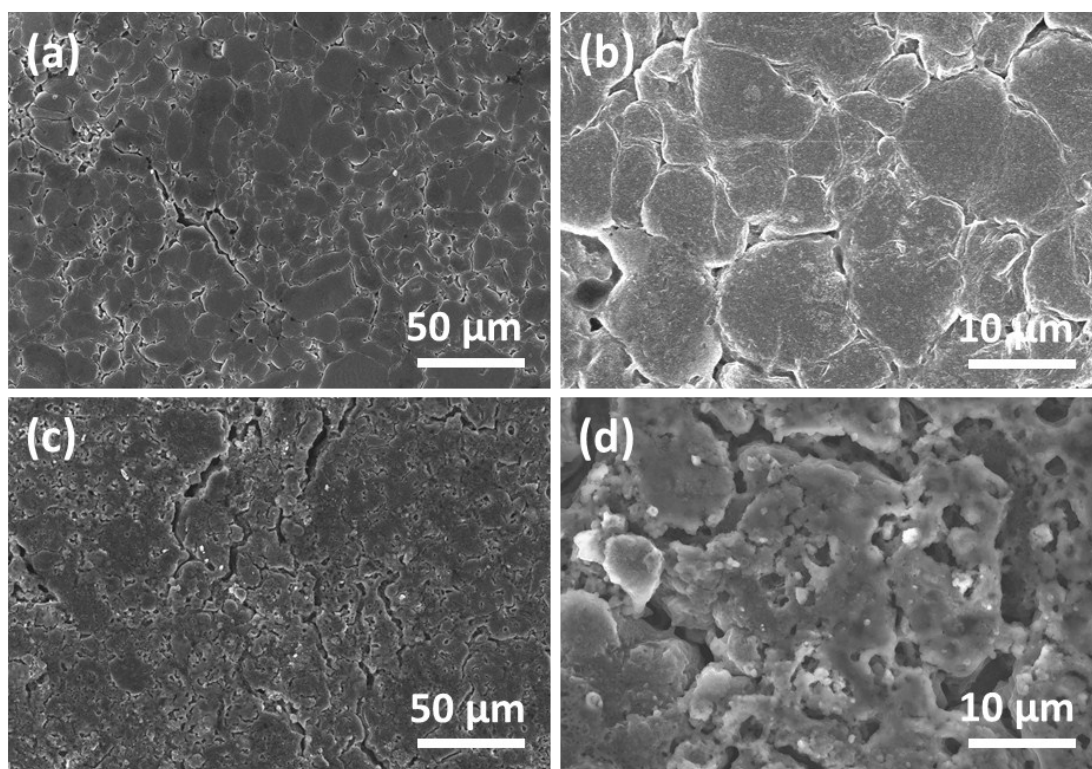

**Fig. S12** SEM images of the Li anodes paired with the (a, b) Fc-CMK@S@Den-GO and (c, d) Fc-CMK@S electrodes after 750 cycles.

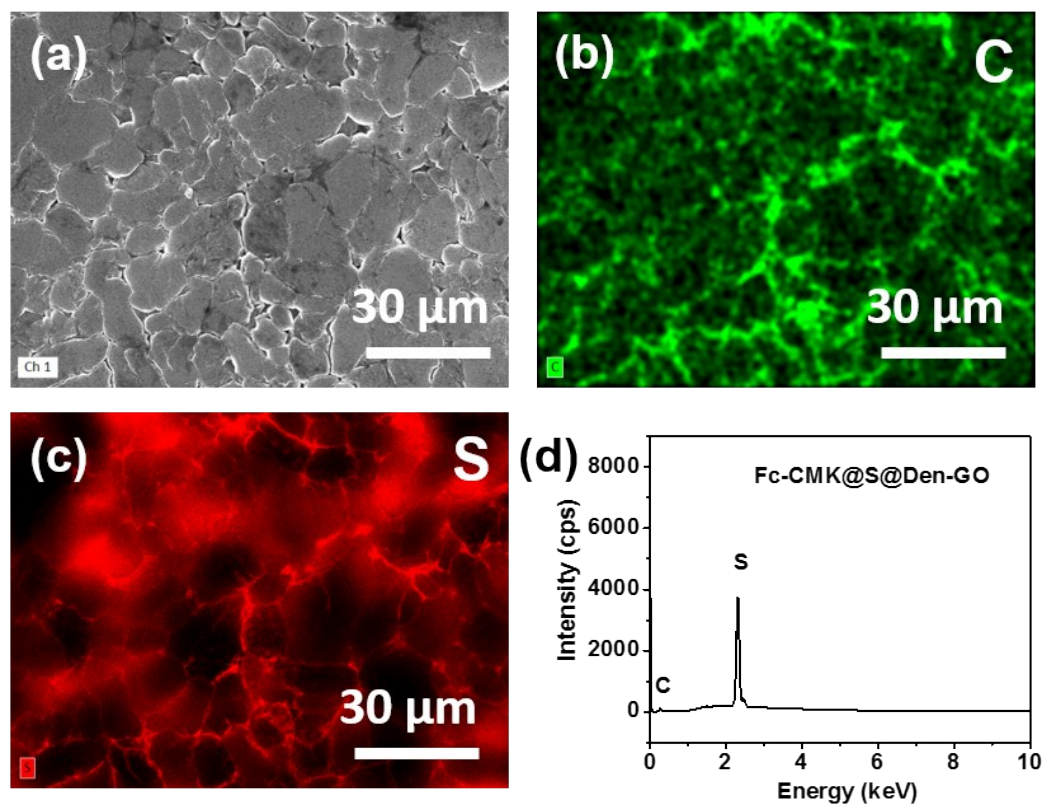

**Fig. S13 SEM-EDX analysis of the cycled Li anode paired with the Fc-CMK@S@Den-GO cathode. (a)** SEM image; elemental maps of (b) C and (c) S; (d) the corresponding EDX spectrum.

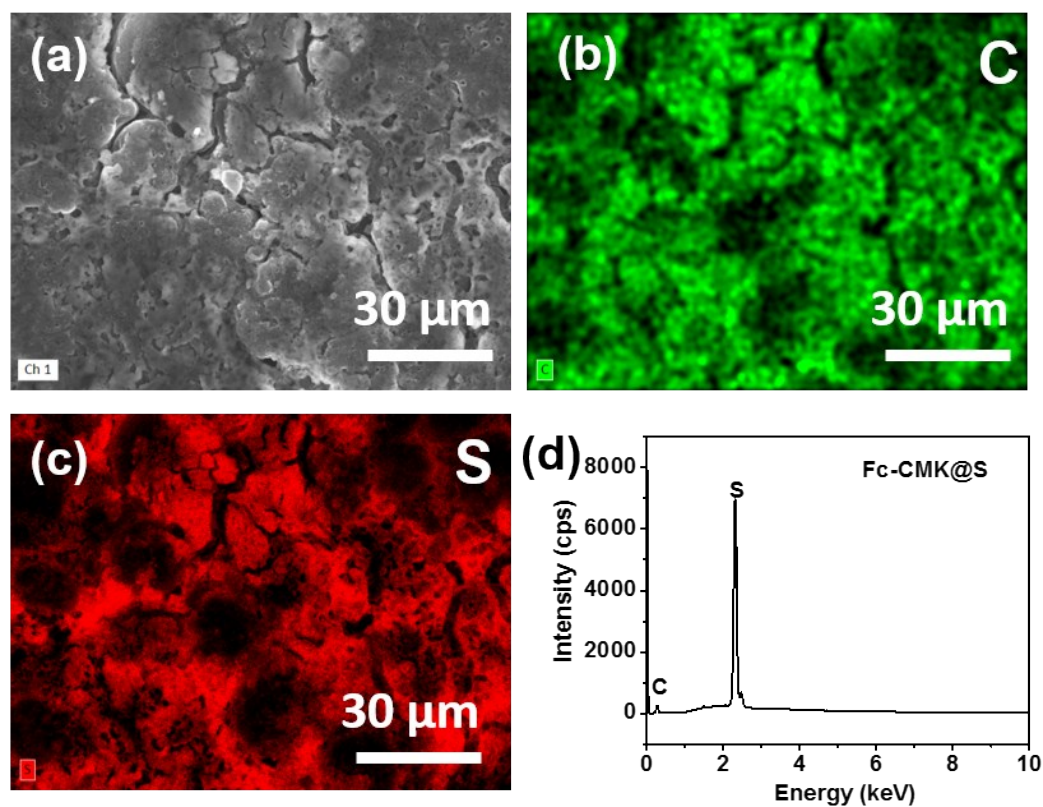

**Fig. S14 SEM-EDX analysis of the cycled Li anode paired with the Fc-CMK@S cathode.** (a) SEM image; elemental maps of (b) C and (c) S; (d) the corresponding EDX spectrum.

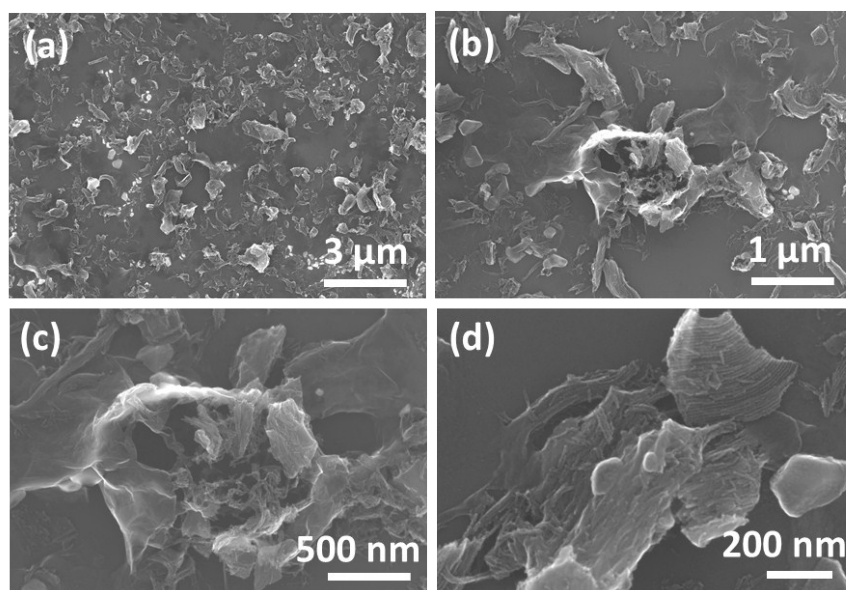

**Fig. S15** SEM images of Fc-CMK@S@GO.

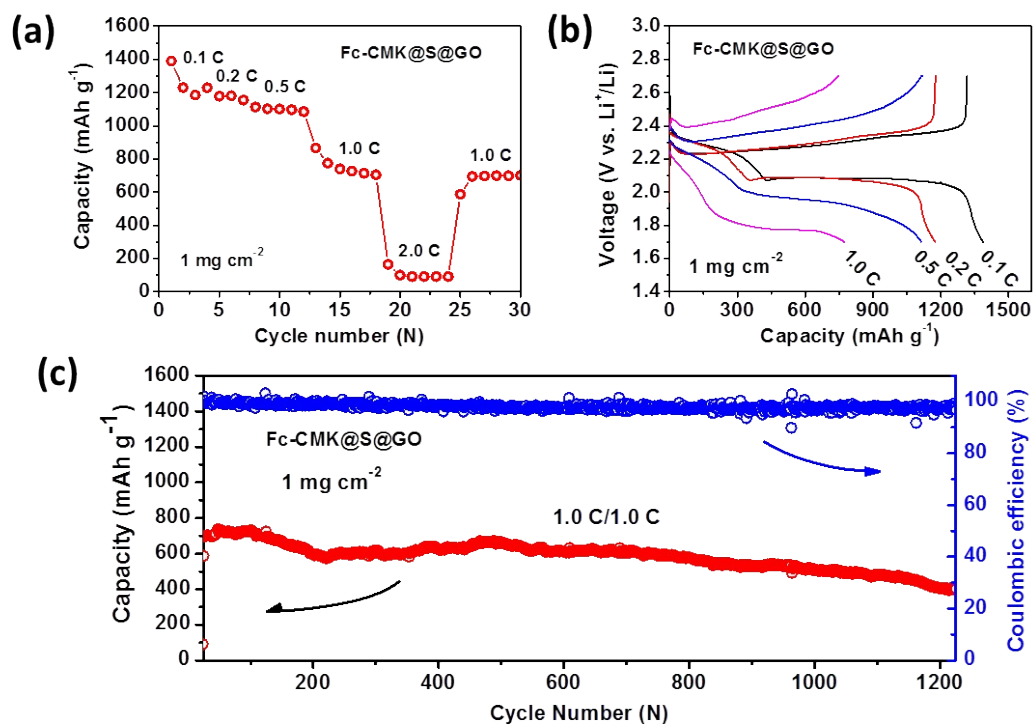

**Fig. S16** Electrochemical performance of a Li-S cell with the Fc-CMK@S@GO material as the cathode.

(a) Specific capacities and (b) the corresponding discharging/charging voltage profiles at various rates.

(c) Long-term cycling stability with Coulombic efficiency at 1.0 C.

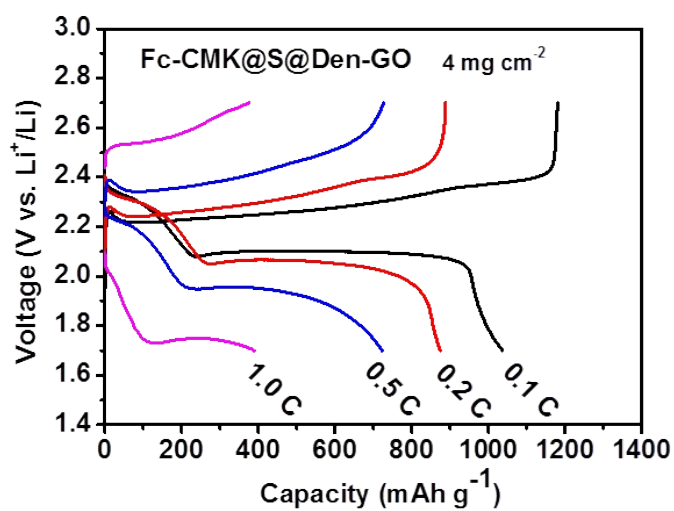

**Fig. S17** Discharging/charging voltage profiles of Fc-CMK@S@Den-GO with S mass loading of 4 mg cm<sup>-2</sup>

<sup>2</sup> on the electrode.
